# Supplementary material for: Range Contraction and Population Decline of the European Dupont’s Lark Population
Source: MDPI journal article supplement (doi:10.3390/d15080928), 2023-08-14
Supplement: s1 [file s1]

## Supplementary material

**Supplementary Table S1.** Interval of years between the II National Census (2004-2007) and the data used for the Current Status (2017-2022) for the Dupont's lark. The asterisk (\*) indicates those cases where data was collected in different years for each province.

|                 | II NC | Current Status | Interval of years |
|-----------------|-------|----------------|-------------------|
| <b>Albacete</b> | 2007* | 2018           | 11                |
| Alicante        | -     | 2022           | -                 |
| Almería         | 2007* | 2021           | 14                |
| Burgos          | 2005  | 2020*          | 15                |
| Cuenca          | 2004  | 2020*          | 16                |
| Granada         | 2007* | 2022           | 15                |
| Guadalajara     | 2006* | 2019*          | 13                |
| Huesca          | 2007* | 2022           | 15                |
| Lleida          | 2004  | 2022           | 18                |
| Murcia          | 2007* | 2022           | 15                |
| Navarra         | 2007  | 2019           | 12                |
| Palencia        | 2005  | 2020           | 15                |
| Segovia         | 2005  | 2022*          | 17                |
| Soria           | 2005* | 2021*          | 16                |
| Teruel          | 2007  | 2019*          | 12                |
| Toledo          | 2007  | 2018           | 11                |
| Valencia        | 2005* | 2022           | 17                |
| Zamora          | 2007* | 2020           | 13                |
| Zaragoza        | 2006* | 2019*          | 13                |

**Supplementary Table S2.** Number of territorial males per province and population change between the II National Census and the Current Status. Number of years elapsed between both periods is shown in Supplementary Table S1. The last column indicates those provinces farther from the core of the Iberian distribution.

|             | <b>II National<br/>Census</b> | <b>Current<br/>Status</b> | <b>Annual<br/>population<br/>change (%)</b> | <b>Population<br/>change (%)</b> | <b>Peripheral<br/>population</b> |
|-------------|-------------------------------|---------------------------|---------------------------------------------|----------------------------------|----------------------------------|
| Albacete    | 36                            | 3                         | -20.22                                      | -91.67                           | Yes                              |
| Alicante    | Unknown                       | 1                         | *                                           | *                                | Yes                              |
| Almería     | 15                            | 6                         | 6.34                                        | -60                              | Yes                              |
| Burgos      | 4                             | 6                         | 2.74                                        | 50                               | No                               |
| Cuenca      | 162                           | 42                        | -8.09                                       | -74.07                           | No                               |
| Granada     | 15                            | 5                         | -7.06                                       | -66.67                           | Yes                              |
| Guadalajara | 472                           | 460                       | -0.2                                        | -2.54                            | No                               |
| Huesca      | 21                            | 8                         | -6.23                                       | -61.9                            | Yes                              |
| Lleida      | 0                             | 2                         | *                                           | *                                | Yes                              |
| Murcia      | 38                            | 4                         | -13.94                                      | -89.47                           | Yes                              |
| Navarra     | 57                            | 35                        | -3.98                                       | -38.6                            | No                               |
| Palencia    | 6                             | 0                         | -100                                        | -100                             | Yes                              |
| Segovia     | 79                            | 112                       | 2.07                                        | 41.77                            | No                               |
| Soria       | 732                           | 908                       | 1.36                                        | 24.04                            | No                               |
| Teruel      | 880                           | 266                       | -9.49                                       | -69.77                           | No                               |
| Toledo      | 2                             | 0                         | -100                                        | -100                             | Yes                              |
| Valencia    | 47                            | 10                        | -8.7                                        | -78.72                           | Yes                              |
| Zamora      | 61                            | 0                         | -100                                        | -100                             | Yes                              |
| Zaragoza    | 640                           | 421                       | -3.17                                       | -34.22                           | No                               |

\* Annual population change is not calculated for colonization/recolonization of the species

**Supplementary Table S3.** Number of 1x1 grids with presence of the Dupont's lark during the II National Census and the Current Status per province. Last column indicates the percentage change in 1x1 grids.

| <b>Province</b>    | <b>II National Census</b> | <b>Current Status</b> | <b>Percentage change (%)</b> |
|--------------------|---------------------------|-----------------------|------------------------------|
| <b>Albacete</b>    | 10                        | 2                     | -80.00                       |
| <b>Alicante</b>    | 0                         | 1                     | *                            |
| <b>Almería</b>     | 10                        | 5                     | -50.00                       |
| <b>Burgos</b>      | 4                         | 3                     | -25.00                       |
| <b>Cuenca</b>      | 41                        | 18                    | -56.10                       |
| <b>Granada</b>     | 5                         | 4                     | -20.00                       |
| <b>Guadalajara</b> | 123                       | 132                   | 7.32                         |
| <b>Huesca</b>      | 6                         | 6                     | 0.00                         |
| <b>Lleida</b>      | 0                         | 1                     | *                            |
| <b>Murcia</b>      | 16                        | 4                     | -75.00                       |
| <b>Navarra</b>     | 16                        | 18                    | 12.50                        |
| <b>Palencia</b>    | 2                         | 0                     | -100.00                      |
| <b>Segovia</b>     | 19                        | 25                    | 31.58                        |
| <b>Soria</b>       | 261                       | 192                   | -26.44                       |
| <b>Teruel</b>      | 259                       | 104                   | -59.85                       |
| <b>Toledo</b>      | 2                         | 0                     | -100.00                      |
| <b>Valencia</b>    | 12                        | 3                     | -75.00                       |
| <b>Zamora</b>      | 21                        | 0                     | -100.00                      |
| <b>Zaragoza</b>    | 206                       | 130                   | -36.89                       |

\* Percentage change is not calculated for colonization/recolonization of the species

**Supplementary Table S4.** Extant subpopulations for the Current Status of the Dupont's lark. They are shown in alphabetical order of province.

| <b>Province</b>          | <b>Subpopulation</b>  | <b>Population</b>                 |
|--------------------------|-----------------------|-----------------------------------|
| <b>Albacete</b>          | Hoya Gonzalo          | Hoya Gonzalo                      |
| <b>Alicante</b>          | Villena               | Villena                           |
| <b>Almería</b>           | Las Amoladeras        | Cabo de Gata                      |
| <b>Burgos</b>            | Páramo de Corcos      | Hoces y Corcos                    |
| <b>Cuenca</b>            | Saelices              | Uclés-Saelices                    |
| <b>Cuenca</b>            | Zafra de Záncara      | Zafra de Záncara                  |
| <b>Cuenca</b>            | Carboneras de Guazaón | Carboneras de Guazaón - Cardenete |
| <b>Cuenca</b>            | Cardenete             | Carboneras de Guazaón - Cardenete |
| <b>Cuenca</b>            | Moya sur              | Ademuz                            |
| <b>Cuenca</b>            | Moya norte            | Ademuz                            |
| <b>Granada, Almería</b>  | Sierra de Baza        | Sierra de Baza                    |
| <b>Guadalajara</b>       | Hiendelaencina        | Sistema Ibérico oeste             |
| <b>Guadalajara</b>       | Sigüenza oeste        | Sistema Ibérico oeste             |
| <b>Guadalajara</b>       | La Torresaviñán       | Sistema Ibérico oeste             |
| <b>Guadalajara</b>       | Esplegares            | Sistema Ibérico oeste             |
| <b>Guadalajara</b>       | Hortezuela de Océn    | Sistema Ibérico oeste             |
| <b>Guadalajara</b>       | Riba de Saelices      | Sistema Ibérico oeste             |
| <b>Guadalajara</b>       | Cueva de la Hoz       | Sistema Ibérico oeste             |
| <b>Guadalajara</b>       | Maranchón             | Sistema Ibérico oeste             |
| <b>Guadalajara</b>       | Casrtilnovo           | Sistema Ibérico este              |
| <b>Guadalajara</b>       | Rio Gallo             | Sistema Ibérico este              |
| <b>Guadalajara</b>       | Tartanedo – Torrubia  | Sistema Ibérico este              |
| <b>Huesca</b>            | Bajo Cinca            | Bajo Cinca                        |
| <b>Lleida</b>            | Alfés                 | Alfés                             |
| <b>Murcia</b>            | Sierra de Picarcho    | Cieza                             |
| <b>Navarra</b>           | Bardenas              | Bardenas                          |
| <b>Navarra, Zaragoza</b> | Ablitas               | Ablitas - Campo de Borja          |
| <b>Segovia</b>           | Hoces del Duratón     | Hoces y Corcos                    |
| <b>Segovia</b>           | Los Castros           | Hoces y Corcos                    |
| <b>Segovia</b>           | Hoces del Riaza sur   | Hoces y Corcos                    |
| <b>Segovia</b>           | Hoces del Riaza este  | Hoces y Corcos                    |
| <b>Segovia</b>           | Hoces del Riaza oeste | Hoces y Corcos                    |
| <b>Soria</b>             | Villanueva de Gormaz  | Sistema Ibérico oeste             |
| <b>Soria</b>             | Atauta                | Sistema Ibérico oeste             |
| <b>Soria</b>             | San Esteban de Gormaz | Sistema Ibérico oeste             |

|                           |                               |                            |
|---------------------------|-------------------------------|----------------------------|
| <b>Soria</b>              | Berlanga de Duero             | Sistema Ibérico oeste      |
| <b>Soria</b>              | Caltojar                      | Sistema Ibérico oeste      |
| <b>Soria</b>              | Nafría la Llana               | Golmayo                    |
| <b>Soria</b>              | Barahona-Alcubilla            | Sistema Ibérico oeste      |
| <b>Soria</b>              | Las Fraguas                   | Golmayo                    |
| <b>Soria</b>              | Pinilla del Campo             | Moncayo - Gómara           |
| <b>Soria</b>              | Dévanos                       | Moncayo - Gómara norte     |
| <b>Soria, Guadalajara</b> | Retortillo - Rello – Barcones | Sistema Ibérico oeste      |
| <b>Soria, Guadalajara</b> | Sigüenza este                 | Sistema Ibérico oeste      |
| <b>Soria, Guadalajara</b> | Medinaceli - Layna – Anguita  | Sistema Ibérico oeste      |
| <b>Soria, Guadalajara</b> | Conquezueta                   | Sistema Ibérico oeste      |
| <b>Soria, Zaragoza</b>    | Cihuela                       | Moncayo - Gómara           |
| <b>Teruel</b>             | Pozondón                      | Pozondón                   |
| <b>Teruel</b>             | Odón - Blancas                | Sistema Ibérico este       |
| <b>Teruel</b>             | Sierra de Javalambre          | Ademuz                     |
| <b>Teruel</b>             | Valdecebro                    | Altiplano                  |
| <b>Teruel</b>             | Celadas este                  | Altiplano                  |
| <b>Teruel</b>             | Santa Eulalia                 | Pozondón                   |
| <b>Teruel</b>             | Pancrudo - Rillo              | Altiplano                  |
| <b>Teruel</b>             | Lidón                         | Altiplano                  |
| <b>Teruel</b>             | Blancas - Monreal             | Sistema Ibérico este       |
| <b>Teruel</b>             | Caminreal                     | Sistema Ibérico este       |
| <b>Teruel</b>             | El Pobo                       | Altiplano                  |
| <b>Teruel</b>             | Aguilar de Alfambra           | Altiplano                  |
| <b>Teruel</b>             | Perales de Alfambra oeste     | Altiplano                  |
| <b>Teruel</b>             | Perales de Alfambra este      | Altiplano                  |
| <b>Teruel</b>             | Ermita Sant Just              | Altiplano                  |
| <b>Teruel</b>             | Alpeñés                       | Altiplano                  |
| <b>Teruel</b>             | Segura de los Baños este      | Valle del Ebro - Altiplano |
| <b>Teruel</b>             | Galve                         | Altiplano                  |
| <b>Teruel</b>             | Alcaine-Obón                  | Valle del Ebro - Altiplano |
| <b>Teruel</b>             | Muniesa                       | Valle del Ebro - Altiplano |
| <b>Teruel</b>             | Villaroya                     | Altiplano                  |
| <b>Teruel</b>             | Alcaine                       | Valle del Ebro - Altiplano |
| <b>Teruel, Zaragoza</b>   | Segura de los Baños oeste     | Valle del Ebro - Altiplano |
| <b>Teruel, Zaragoza</b>   | Azaila                        | Valle del Ebro - Altiplano |
| <b>Valencia</b>           | Ademuz                        | Ademuz                     |
| <b>Zaragoza</b>           | Monterde                      | Sistema Iberico este       |

|                                  |                             |                            |
|----------------------------------|-----------------------------|----------------------------|
| <b>Zaragoza</b>                  | Torrelapaja                 | Moncayo - Gomara           |
| <b>Zaragoza</b>                  | Cubel                       | Sistema Iberico este       |
| <b>Zaragoza</b>                  | Talamantes                  | Ablitas - Campo de Borja   |
| <b>Zaragoza</b>                  | Used                        | Sistema Iberico este       |
| <b>Zaragoza</b>                  | Calatayud                   | Sistema Iberico este       |
| <b>Zaragoza</b>                  | Maluenda                    | Sistema Iberico este       |
| <b>Zaragoza</b>                  | Campo Romanos               | Sistema Iberico este       |
| <b>Zaragoza</b>                  | La Almunia                  | Valle del Ebro - Altiplano |
| <b>Zaragoza</b>                  | Maria de Huerva             | Valle del Ebro - Altiplano |
| <b>Zaragoza</b>                  | Val de Urra                 | Valle del Ebro - Altiplano |
| <b>Zaragoza</b>                  | Lumpiaque                   | Valle del Ebro - Altiplano |
| <b>Zaragoza</b>                  | Pedrola                     | Valle del Ebro - Altiplano |
| <b>Zaragoza</b>                  | Moyuela                     | Valle del Ebro - Altiplano |
| <b>Zaragoza</b>                  | Cuarte de Huerva este       | Valle del Ebro - Altiplano |
| <b>Zaragoza</b>                  | Juslibol                    | Valle del Ebro - Altiplano |
| <b>Zaragoza</b>                  | Lécera                      | Valle del Ebro - Altiplano |
| <b>Zaragoza</b>                  | Belchite                    | Valle del Ebro - Altiplano |
| <b>Zaragoza</b>                  | Mediana de Aragón           | Valle del Ebro - Altiplano |
| <b>Zaragoza</b>                  | Monegros                    | Valle del Ebro - Altiplano |
| <b>Zaragoza</b>                  | Pina de Ebro                | Valle del Ebro - Altiplano |
| <b>Zaragoza</b>                  | Villafranca de Ebro         | Valle del Ebro - Altiplano |
| <b>Zaragoza,<br/>Guadalajara</b> | Tortuera - Embid - Torralba | Sistema Ibérico este       |

**Supplementary Table S5.** Number and percentage of Dupont's lark occupied 1x1 km grid cells located within SPAs (with Dupont's lark as conservation species target or not) by Autonomous Community and in Spain (Total), and the percentage change (%) between de IINC and CS in and out SPAs, both in the II National Census and the Current Status.

|                            | II National Census |       |         |        |            |       | Current Status |        |         |        |            |       |                       |          |
|----------------------------|--------------------|-------|---------|--------|------------|-------|----------------|--------|---------|--------|------------|-------|-----------------------|----------|
|                            | In SPAs            |       | SPA FND |        | SPA no FND |       | In SPAs        |        | SPA FND |        | SPA no FND |       | Percentage change (%) |          |
|                            | Nº                 | %     | Nº      | %      | Nº         | %     | N              | %      | N       | %      | N          | %     | In SPAs               | Out SPAs |
| Andalucía                  | 2                  | 14.30 | 2       | 100.00 | 0          | 0     | 3              | 42.86  | 3       | 100.00 | 0          | 0     | 50                    | -66.67   |
| Aragón                     | 219                | 47.30 | 219     | 100.00 | 0          | 0     | 99             | 42.13  | 99      | 100.00 | 0          | 0     | -54.79                | -44.26   |
| Castilla - La Mancha       | 87                 | 49.43 | 47      | 54.02  | 40         | 45.98 | 49             | 32.24  | 24      | 48.98  | 25         | 51.02 | -43.68                | 15.73    |
| Castilla y León            | 138                | 44.95 | 138     | 100.00 | 0          | 0     | 104            | 47.27  | 102     | 98.08  | 2          | 1.92  | -24.64                | -31.36   |
| Cataluña                   | 0                  | -     | 0       | -      | 0          | -     | 1              | 100.00 | 1       | 100.00 | 0          | 0     | -                     | -        |
| Comunidad Foral de Navarra | 2                  | 12.50 | 2       | 100.00 | 0          | 0     | 2              | 11.11  | 2       | 100.00 | 0          | 0     | 0                     | 14.29    |
| Comunitat Valenciana       | 9                  | 75.00 | 9       | 100.00 | 0          | 0     | 2              | 50     | 2       | 100.00 | 0          | 0     | -77.78                | -33.33   |
| Región de Murcia           | 1                  | 6.25  | 0       | 0      | 1          | 100   | 0              | 0      | 0       | 0      | 0          | 0     | -100                  | -73.33   |
| Total grid cells           | 458                | 45.62 | 417     | 91.05  | 41         | 8.95  | 260            | 40.56  | 233     | 89.62  | 27         | 10.38 | -43.23                | -30.22   |
